# Supplementary material for: Association between oral microbiome and breast cancer in the east Asian population: A Mendelian randomization and case–control study
Source: PubMed Central journal article supplement (PMC11045337; doi:10.1111/1759-7714.15280), 2024-03-14
Supplement: TCA-15-974-s002.pdf [file TCA-15-974-s002.pdf]

# Supplementary Material

## 1 Supplementary Figures and Tables

### 1.1 Supplementary Figures

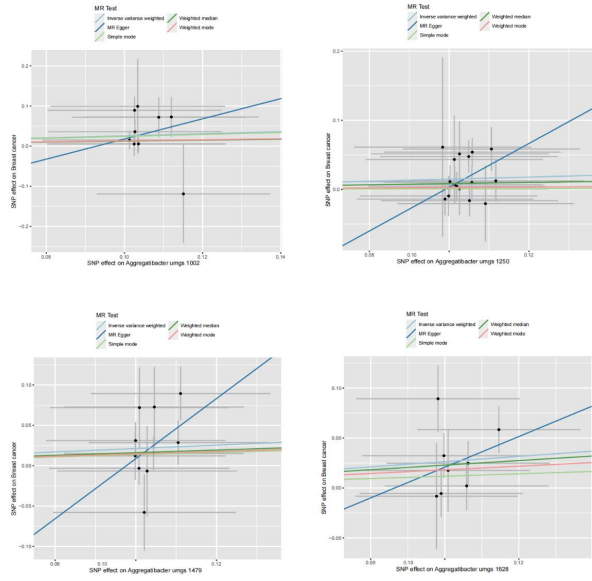

**Supplementary Figure S1.** Scatter plots of the association between *Genus\_Aggregatibacter* of tongue microbiome and breast cancer.

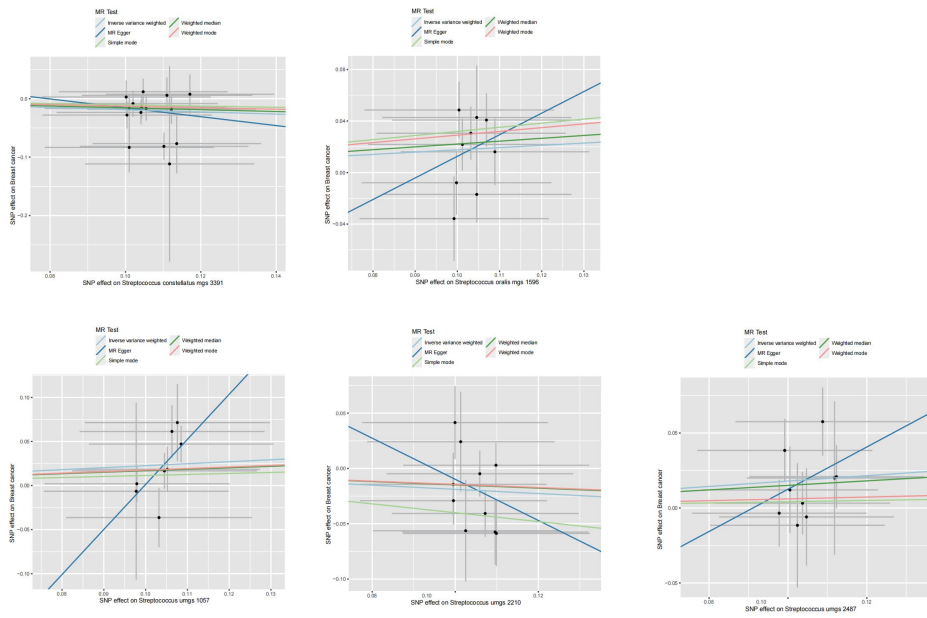

**Supplementary Figure S2.** Scatter plots of the association between *Genus\_Streptococcus* of tongue microbiome and breast cancer.

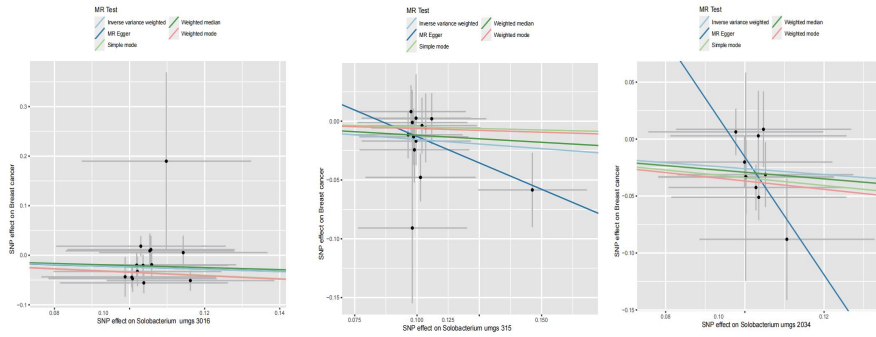

**Supplementary Figure S3.** Scatter plots of the association between *Genus\_Solobacterium* of tongue microbiome and breast cancer.

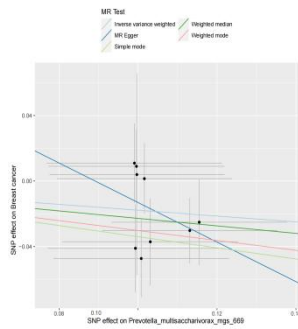

**Supplementary Figure S4.** Scatter plots of the Association Between *Genus\_Prevotella* of tongue microbiome and breast cancer.

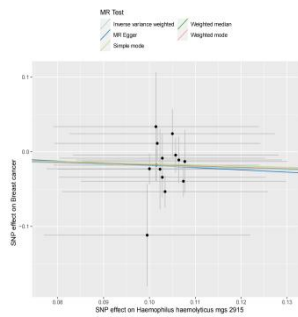

**Supplementary Figure S5.** Scatter plots of the association between *Genus\_Haemophilus* of tongue microbiome and breast cancer.

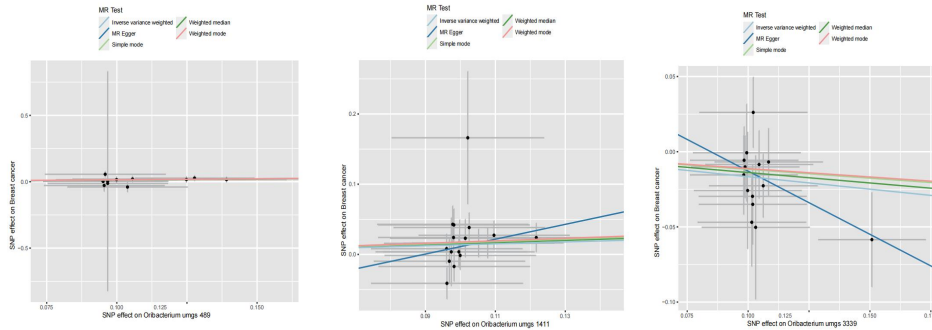

**Supplementary Figure S6.** Scatter plots of the association between *Genus\_Oribacterium* of tongue microbiome and breast cancer.

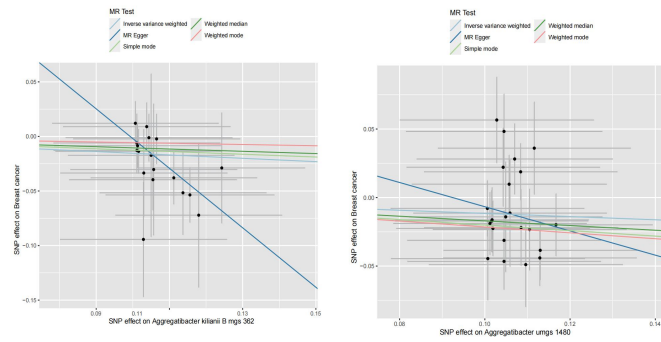

**Supplementary Figure S7.** Scatter plots of the association between *Genus\_Aggregatibacte* of saliva microbiome and breast cancer.

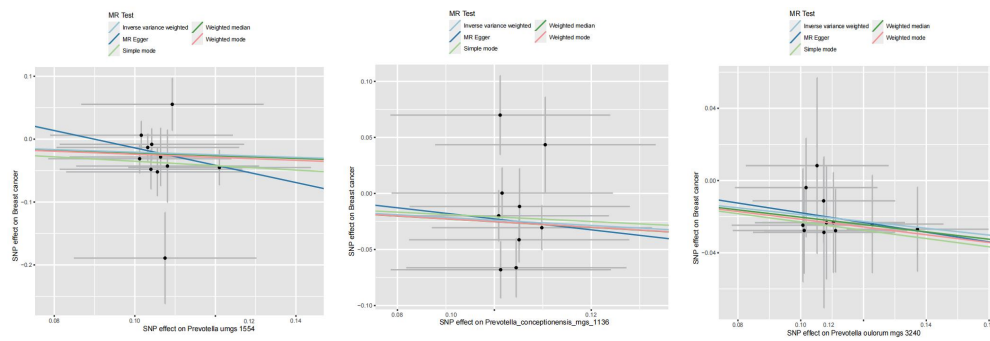

**Supplementary Figure S8.** Scatter plots of the association between *Genus\_Prevotella* of saliva microbiome and breast cancer.

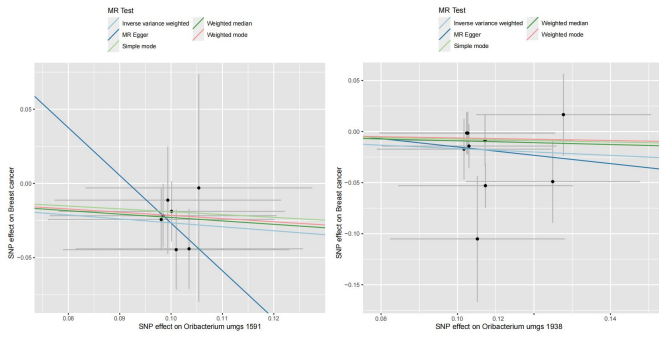

**Supplementary Figure S9.** Scatter plots of the association between *Genus\_Oribacterium* of saliva microbiome and breast cancer.

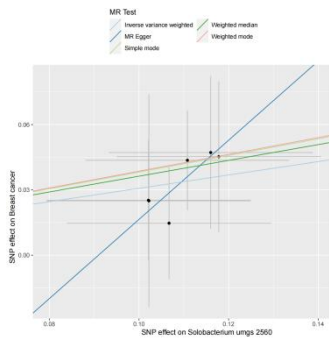

**Supplementary Figure S10.** Scatter plots of the association between *Genus\_Solobacterium* of saliva microbiome and breast cancer.

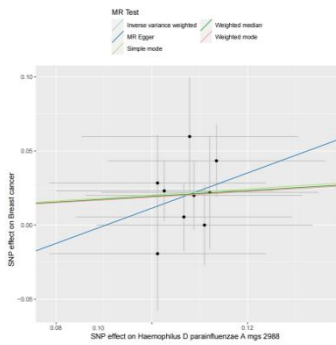

**Supplementary Figure S11.** Scatter plots of the association between *Genus\_Haemophilus* of saliva microbiome and breast cancer.

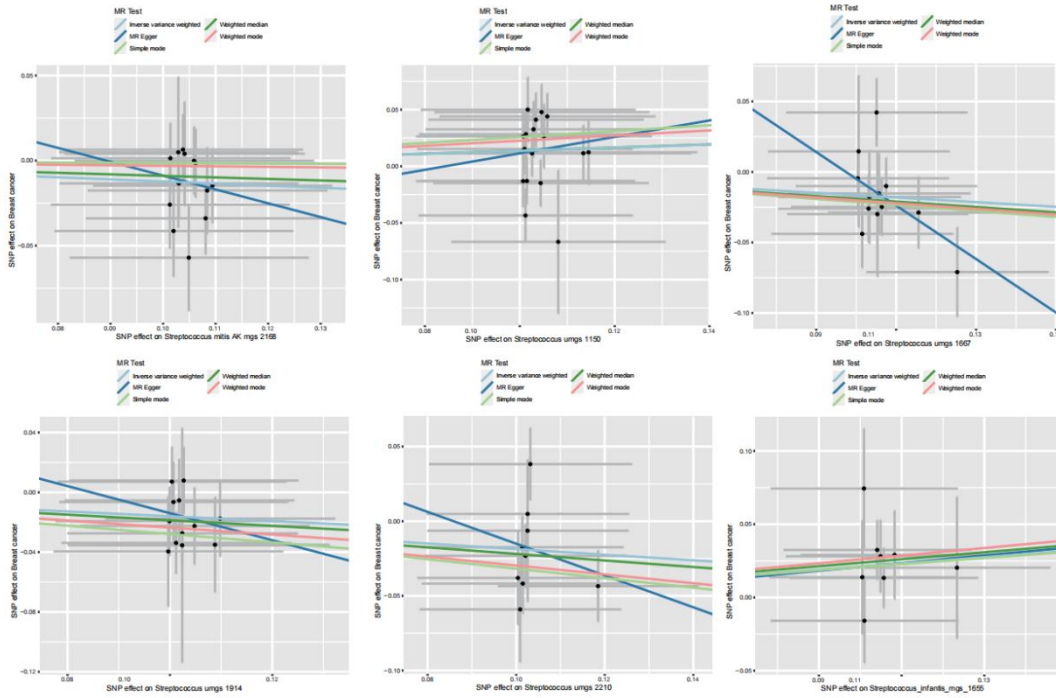

**Supplementary Figure S12.** Scatter plots of the association between *Genus\_Streptococcus* of saliva microbiome and breast cancer.

## 1.2 Supplementary Tables

Table S1. The Association of Relative Abundance of Tongue Microbiome with Breast Cancer

|                 | Bacteria species          | Method          | N. SNP | Beta  | SE    | P value | OR (95% CI)             | R <sup>2</sup> | F-statistics | Cochran's Q |      |        | Horizontal pleiotropy |       |         |
|-----------------|---------------------------|-----------------|--------|-------|-------|---------|-------------------------|----------------|--------------|-------------|------|--------|-----------------------|-------|---------|
|                 |                           |                 |        |       |       |         |                         |                |              | Q           | Q_df | Q_pval | Egger intercept       | SE    | P value |
| Aggregatibacter | Aggregatibacter umgs 1628 | MR Egger        | 8      | 1.536 | 1.936 | 0.458   | 4.645(0.105-206.454)    | 0.087          | 23.620       | 8.101       | 6    | 0.231  | -0.133                | 0.202 | 0.535   |
|                 |                           | Weighted median |        | 0.229 | 0.127 | 0.072   | 1.257(0.98-1.613)       |                |              |             |      |        |                       |       |         |
|                 |                           | IVW             |        | 0.264 | 0.100 | 0.008   | 1.302(1.07-1.584)       |                |              | 8.686       | 7    | 0.276  |                       |       |         |
|                 |                           | Simple mode     |        | 0.118 | 0.194 | 0.562   | 1.126(0.769-1.647)      |                |              |             |      |        |                       |       |         |
|                 |                           | Weighted mode   |        | 0.182 | 0.171 | 0.323   | 1.199(0.858-1.677)      |                |              |             |      |        |                       |       |         |
|                 | Aggregatibacter umgs 1002 | MR Egger        | 9      | 2.512 | 4.463 | 0.591   | 12.335(0.002-77703.059) | 0.112          | 24.946       | 8.701       | 7    | 0.275  | -0.233                | 0.462 | 0.629   |
|                 |                           | Weighted median |        | 0.124 | 0.148 | 0.400   | 1.132(0.848-1.513)      |                |              |             |      |        |                       |       |         |
|                 |                           | IVW             |        | 0.257 | 0.110 | 0.020   | 1.293(1.042-1.604)      |                |              | 9.019       | 8    | 0.341  |                       |       |         |
|                 |                           | Simple mode     |        | 0.243 | 0.207 | 0.276   | 1.275(0.849-1.914)      |                |              |             |      |        |                       |       |         |
|                 |                           | Weighted mode   |        | 0.132 | 0.146 | 0.394   | 1.141(0.856-1.52)       |                |              |             |      |        |                       |       |         |
|                 | Aggregatibacter umgs 1479 | MR Egger        | 10     | 3.721 | 2.454 | 0.168   | 41.326(0.337-5075.047)  | 0.109          | 24.106       | 8.839       | 8    | 0.356  | -0.363                | 0.254 | 0.190   |

|                               |                           |                         |          |       |       |       |                        |                      |        |        |        |       |        |        |       |       |
|-------------------------------|---------------------------|-------------------------|----------|-------|-------|-------|------------------------|----------------------|--------|--------|--------|-------|--------|--------|-------|-------|
|                               |                           | Weighted median         |          | 0.161 | 0.122 | 0.186 | 1.175(0.925-1.492)     |                      |        |        |        |       |        |        |       |       |
|                               |                           | IVW                     |          | 0.212 | 0.098 | 0.031 | 1.236(1.019-1.499)     |                      |        |        | 11.101 | 9     | 0.269  |        |       |       |
|                               |                           | Simple mode             |          | 0.136 | 0.188 | 0.486 | 1.146(0.793-1.657)     |                      |        |        |        |       |        |        |       |       |
|                               |                           | Weighted mode           |          | 0.147 | 0.127 | 0.279 | 1.158(0.902-1.486)     |                      |        |        |        |       |        |        |       |       |
|                               | Aggregatibacter umgs 1250 | MR Egger                | 16       | 3.162 | 1.973 | 0.131 | 23.613(0.494-1129.741) | 0.187                | 26.732 | 11.078 | 14     | 0.680 | -0.313 | 0.205  | 0.149 |       |
|                               |                           | Weighted median         |          | 0.085 | 0.099 | 0.389 | 1.089(0.898-1.321)     |                      |        |        |        |       |        |        |       |       |
|                               |                           | IVW                     |          | 0.149 | 0.067 | 0.025 | 1.161(1.019-1.323)     |                      |        |        | 13.411 | 15    | 0.571  |        |       |       |
|                               |                           | Simple mode             |          | 0.009 | 0.156 | 0.954 | 1.009(0.744-1.369)     |                      |        |        |        |       |        |        |       |       |
|                               |                           | Weighted mode           |          | 0.029 | 0.139 | 0.839 | 1.029(0.783-1.353)     |                      |        |        |        |       |        |        |       |       |
|                               | Streptococcus             | Streptococcus umgs 2487 | MR Egger | 9     | 1.409 | 1.631 | 0.416                  | 4.092(0.167-100.095) | 0.100  | 24.500 | 5.852  | 7     | 0.557  | -0.128 | 0.170 | 0.475 |
| Weighted median               |                           |                         | 0.151    |       | 0.112 | 0.178 | 1.162(0.934-1.447)     |                      |        |        |        |       |        |        |       |       |
| IVW                           |                           |                         | 0.179    |       | 0.081 | 0.027 | 1.196(1.021-1.402)     |                      |        |        | 6.421  | 8     | 0.600  |        |       |       |
| Simple mode                   |                           |                         | 0.042    |       | 0.181 | 0.824 | 1.043(0.731-1.486)     |                      |        |        |        |       |        |        |       |       |
| Weighted mode                 |                           |                         | 0.061    |       | 0.160 | 0.715 | 1.062(0.776-1.455)     |                      |        |        |        |       |        |        |       |       |
| Streptococcus oralis mgs 1596 |                           | MR Egger                | 9        | 1.677 | 3.116 | 0.607 | 5.348(0.012-2400.838)  | 0.096                | 23.215 | 8.007  | 6      | 0.238 | 0.454  | 0.276  | 0.151 |       |
|                               |                           | Weighted median         |          | 0.221 | 0.112 | 0.048 | 1.248(1.002-1.554)     |                      |        |        |        |       |        |        |       |       |

Supplementary Material

|  |                                           |                 |    |        |       |       |                          |       |        |        |    |        |        |       |       |  |  |  |
|--|-------------------------------------------|-----------------|----|--------|-------|-------|--------------------------|-------|--------|--------|----|--------|--------|-------|-------|--|--|--|
|  |                                           | IVW             |    | 0.176  | 0.086 | 0.042 | 1.192(1.007-1.412)       |       |        | 11.616 | 7  | 0.114  |        |       |       |  |  |  |
|  |                                           | Simple mode     |    | 0.319  | 0.172 | 0.101 | 1.376(0.981-1.929)       |       |        |        |    |        |        |       |       |  |  |  |
|  |                                           | Weighted mode   |    | 0.290  | 0.152 | 0.092 | 1.337(0.993-1.8)         |       |        |        |    |        |        |       |       |  |  |  |
|  | Streptococcus<br>constellatus<br>mgs 3391 | MR Egger        | 5  | -0.760 | 1.590 | 0.641 | 0.468(0.021-10.56)       | 0.057 | 23.914 | 15.406 | 13 | 0.283  | 0.060  | 0.168 | 0.725 |  |  |  |
|  |                                           | Weighted median |    | -0.157 | 0.089 | 0.079 | 0.855(0.717-1.019)       |       |        |        |    |        |        |       |       |  |  |  |
|  |                                           | IVW             |    | -0.189 | 0.066 | 0.004 | 0.828(0.728-0.942)       |       |        |        |    | 15.559 | 14     | 0.341 |       |  |  |  |
|  |                                           | Simple mode     |    | -0.105 | 0.115 | 0.376 | 0.9(0.718-1.128)         |       |        |        |    |        |        |       |       |  |  |  |
|  |                                           | Weighted mode   |    | -0.129 | 0.107 | 0.250 | 0.879(0.713-1.085)       |       |        |        |    |        |        |       |       |  |  |  |
|  | Streptococcus<br>umgs 1057                | MR Egger        | 8  | 5.110  | 2.520 | 0.089 | 165.678(1.186-23143.211) | 0.098 | 24.036 | 4.633  | 6  | 0.592  | -0.510 | 0.263 | 0.100 |  |  |  |
|  |                                           | Weighted median |    | 0.168  | 0.124 | 0.177 | 1.183(0.927-1.509)       |       |        |        |    |        |        |       |       |  |  |  |
|  |                                           | IVW             |    | 0.225  | 0.098 | 0.021 | 1.252(1.034-1.517)       |       |        |        |    | 8.395  | 7      | 0.299 |       |  |  |  |
|  |                                           | Simple mode     |    | 0.114  | 0.170 | 0.523 | 1.121(0.803-1.564)       |       |        |        |    |        |        |       |       |  |  |  |
|  |                                           | Weighted mode   |    | 0.176  | 0.156 | 0.297 | 1.192(0.878-1.618)       |       |        |        |    |        |        |       |       |  |  |  |
|  | Streptococcus<br>umgs 2210                | MR Egger        | 10 | -1.859 | 2.277 | 0.438 | 0.156(0.002-13.505)      | 0.123 | 25.261 | 10.653 | 8  | 0.222  | 0.176  | 0.240 | 0.484 |  |  |  |
|  |                                           | Weighted median |    | -0.148 | 0.114 | 0.193 | 0.862(0.69-1.078)        |       |        |        |    |        |        |       |       |  |  |  |
|  |                                           | IVW             |    | -0.189 | 0.088 | 0.031 | 0.828(0.697-0.983)       |       |        |        |    | 11.370 | 9      | 0.251 |       |  |  |  |
|  |                                           | Simple mode     |    | -0.400 | 0.192 | 0.067 | 0.67(0.46-0.977)         |       |        |        |    |        |        |       |       |  |  |  |



|              |                                               |                 |    |        |       |       |                     |       |        |        |    |       |        |       |       |
|--------------|-----------------------------------------------|-----------------|----|--------|-------|-------|---------------------|-------|--------|--------|----|-------|--------|-------|-------|
|              |                                               | Weighted mode   |    | -0.144 | 0.152 | 0.370 | 0.866(0.642-1.167)  |       |        |        |    |       |        |       |       |
| Prevotella   | Prevotella_mu<br>ltisaccharivora<br>x_mgs_669 | MR Egger        | 9  | -1.207 | 1.346 | 0.400 | 0.299(0.021-4.182)  | 0.098 | 23.829 | 6.316  | 7  | 0.503 | 0.108  | 0.140 | 0.469 |
|              |                                               | Weighted median |    | -0.228 | 0.108 | 0.035 | 0.796(0.644-0.984)  |       |        |        |    |       |        |       |       |
|              |                                               | IVW             |    | -0.178 | 0.079 | 0.023 | 0.837(0.717-0.976)  |       |        | 6.902  | 8  | 0.547 |        |       |       |
|              |                                               | Simple mode     |    | -0.340 | 0.180 | 0.095 | 0.712(0.5-1.012)    |       |        |        |    |       |        |       |       |
|              |                                               | Weighted mode   |    | -0.302 | 0.154 | 0.086 | 0.739(0.546-1)      |       |        |        |    |       |        |       |       |
| Haemophilus  | Haemophilus<br>haemolyticus<br>mgs 2915       | MR Egger        | 14 | -0.299 | 2.969 | 0.921 | 0.741(0.002-249.65) | 0.150 | 24.626 | 10.429 | 12 | 0.578 | 0.012  | 0.307 | 0.971 |
|              |                                               | Weighted median |    | -0.175 | 0.102 | 0.085 | 0.839(0.688-1.024)  |       |        |        |    |       |        |       |       |
|              |                                               | IVW             |    | -0.187 | 0.071 | 0.008 | 0.829(0.721-0.953)  |       |        | 10.431 | 13 | 0.658 |        |       |       |
|              |                                               | Simple mode     |    | -0.159 | 0.156 | 0.327 | 0.853(0.628-1.159)  |       |        |        |    |       |        |       |       |
|              |                                               | Weighted mode   |    | -0.172 | 0.148 | 0.267 | 0.842(0.63-1.125)   |       |        |        |    |       |        |       |       |
| Oribacterium | Oribacterium<br>umgs 489                      | MR Egger        | 11 | 0.158  | 0.461 | 0.740 | 1.171(0.475-2.889)  | 0.150 | 28.978 | 7.882  | 9  | 0.546 | -0.002 | 0.052 | 0.972 |
|              |                                               | Weighted median |    | 0.134  | 0.091 | 0.138 | 1.144(0.958-1.366)  |       |        |        |    |       |        |       |       |
|              |                                               | IVW             |    | 0.142  | 0.067 | 0.035 | 1.152(1.01-1.314)   |       |        | 7.883  | 10 | 0.640 |        |       |       |
|              |                                               | Simple mode     |    | 0.140  | 0.105 | 0.214 | 1.15(0.936-1.413)   |       |        |        |    |       |        |       |       |
|              |                                               | Weighted mode   |    | 0.148  | 0.095 | 0.151 | 1.159(0.962-1.397)  |       |        |        |    |       |        |       |       |

Supplementary Material

|               |                         |                 |    |        |       |       |                     |       |        |        |    |       |        |       |       |
|---------------|-------------------------|-----------------|----|--------|-------|-------|---------------------|-------|--------|--------|----|-------|--------|-------|-------|
|               | Oribacterium umgs 3339  | MR Egger        | 14 | -0.841 | 0.632 | 0.208 | 0.431(0.125-1.487)  | 0.159 | 26.826 | 6.786  | 12 | 0.871 | 0.071  | 0.066 | 0.304 |
|               |                         | Weighted median |    | -0.139 | 0.087 | 0.111 | 0.871(0.734-1.032)  |       |        |        |    |       |        |       |       |
|               |                         | IVW             |    | -0.166 | 0.065 | 0.010 | 0.847(0.746-0.962)  |       |        | 7.940  | 13 | 0.847 |        |       |       |
|               |                         | Simple mode     |    | -0.117 | 0.145 | 0.434 | 0.889(0.669-1.182)  |       |        |        |    |       |        |       |       |
|               |                         | Weighted mode   |    | -0.112 | 0.127 | 0.394 | 0.894(0.697-1.147)  |       |        |        |    |       |        |       |       |
|               | Oribacterium umgs 1411  | MR Egger        | 18 | 1.057  | 0.818 | 0.214 | 2.879(0.579-14.305) | 0.198 | 27.056 | 15.707 | 16 | 0.474 | -0.095 | 0.084 | 0.276 |
|               |                         | Weighted median |    | 0.154  | 0.073 | 0.036 | 1.167(1.01-1.348)   |       |        |        |    |       |        |       |       |
|               |                         | IVW             |    | 0.137  | 0.055 | 0.012 | 1.147(1.03-1.276)   |       |        | 16.979 | 17 | 0.456 |        |       |       |
|               |                         | Simple mode     |    | 0.166  | 0.121 | 0.187 | 1.181(0.932-1.497)  |       |        |        |    |       |        |       |       |
|               |                         | Weighted mode   |    | 0.176  | 0.110 | 0.127 | 1.193(0.962-1.48)   |       |        |        |    |       |        |       |       |
| Solobacterium | Solobacterium umgs 2034 | MR Egger        | 10 | -5.172 | 3.001 | 0.123 | 0.006(0-2.035)      | 0.108 | 23.975 | 5.009  | 8  | 0.757 | 0.501  | 0.306 | 0.140 |
|               |                         | Weighted median |    | -0.291 | 0.120 | 0.015 | 0.747(0.591-0.945)  |       |        |        |    |       |        |       |       |
|               |                         | IVW             |    | -0.259 | 0.084 | 0.002 | 0.772(0.655-0.909)  |       |        | 7.691  | 9  | 0.566 |        |       |       |
|               |                         | Simple mode     |    | -0.339 | 0.191 | 0.109 | 0.712(0.49-1.036)   |       |        |        |    |       |        |       |       |
|               |                         | Weighted mode   |    | -0.368 | 0.171 | 0.060 | 0.692(0.495-0.968)  |       |        |        |    |       |        |       |       |
|               | Solobacterium umgs 3016 | MR Egger        | 14 | -0.225 | 1.568 | 0.888 | 0.799(0.037-17.27)  | 0.154 | 25.711 | 15.797 | 12 | 0.201 | -0.001 | 0.165 | 0.994 |
|               |                         | Weighted median |    | -0.207 | 0.092 | 0.025 | 0.813(0.678-0.974)  |       |        |        |    |       |        |       |       |

|  |                        |               |                 |        |       |       |                    |       |        |        |    |       |       |       |       |
|--|------------------------|---------------|-----------------|--------|-------|-------|--------------------|-------|--------|--------|----|-------|-------|-------|-------|
|  |                        | IVW           |                 | -0.236 | 0.071 | 0.001 | 0.79(0.687-0.909)  |       |        | 15.797 | 13 | 0.260 |       |       |       |
|  |                        | Simple mode   |                 | -0.338 | 0.167 | 0.064 | 0.713(0.514-0.989) |       |        |        |    |       |       |       |       |
|  |                        | Weighted mode |                 | -0.345 | 0.164 | 0.056 | 0.708(0.513-0.978) |       |        |        |    |       |       |       |       |
|  | Solobacterium umgs 315 | 13            | MR Egger        | -0.897 | 0.672 | 0.209 | 0.408(0.109-1.522) | 0.146 | 26.222 | 6.866  | 11 | 0.810 | 0.077 | 0.069 | 0.291 |
|  |                        |               | Weighted median | -0.120 | 0.090 | 0.184 | 0.887(0.743-1.059) |       |        |        |    |       |       |       |       |
|  |                        |               | IVW             | -0.156 | 0.067 | 0.021 | 0.856(0.75-0.977)  |       |        | 8.097  | 12 | 0.777 |       |       |       |
|  |                        |               | Simple mode     | -0.050 | 0.140 | 0.727 | 0.951(0.723-1.252) |       |        |        |    |       |       |       |       |
|  |                        |               | Weighted mode   | -0.063 | 0.128 | 0.633 | 0.939(0.731-1.207) |       |        |        |    |       |       |       |       |

SNP, Single Nucleotide Polymorphism; SE, Standard Error; OR, Odds Ratio; CI, Confidence Interval; MR, Mendelian Randomization; IVW, Inverse Variance Weighted; Q\_df, degrees of freedom of Cochran's Q

Table S2. The Association of Relative Abundance of Saliva Microbiome with Breast Cancer

|                 | Bacteria species                   | Method          | N. SNP | Beta   | SE    | P value | OR (95% CI)        | R <sup>2</sup> | F-statistics | Cochran's Q |      | Horizontal pleiotropy |                 |       |         |
|-----------------|------------------------------------|-----------------|--------|--------|-------|---------|--------------------|----------------|--------------|-------------|------|-----------------------|-----------------|-------|---------|
|                 |                                    |                 |        |        |       |         |                    |                |              | Q           | Q_df | Q_pval                | Egger intercept | SE    | P value |
| Aggregatibacter | Aggregatibacter kilianii B mgs 362 | MR Egger        | 18     | -2.725 | 1.240 | 0.043   | 0.066(0.006-0.745) | 0.208          | 27.330       | 7.379       | 16   | 0.965                 | 0.271           | 0.130 | 0.054   |
|                 |                                    | Weighted median |        | -0.105 | 0.085 | 0.219   | 0.9(0.762-1.064)   |                |              |             |      |                       |                 |       |         |
|                 |                                    | IVW             |        | -0.154 | 0.061 | 0.012   | 0.857(0.76-0.966)  |                |              | 11.685      | 17   | 0.819                 |                 |       |         |
|                 |                                    | Simple mode     |        | -0.126 | 0.127 | 0.337   | 0.882(0.687-1.132) |                |              |             |      |                       |                 |       |         |

|               |                           |                 |    |        |                   |       |                     |       |        |        |    |       |       |       |       |
|---------------|---------------------------|-----------------|----|--------|-------------------|-------|---------------------|-------|--------|--------|----|-------|-------|-------|-------|
|               |                           | Weighted mode   |    | -0.057 | 0.107             | 0.600 | 0.945(0.767-1.164)  |       |        |        |    |       |       |       |       |
|               | Aggregatibacter umgs 1480 | MR Egger        | 23 | -0.884 | 1.307             | 0.506 | 0.413(0.032-5.354)  | 0.262 | 28.961 | 29.187 | 21 | 0.110 | 0.082 | 0.139 | 0.563 |
|               |                           | Weighted median |    | -0.170 | 0.071             | 0.017 | 0.843(0.733-0.97)   |       |        |        |    |       |       |       |       |
|               |                           | IVW             |    | -0.116 | 0.056             | 0.039 | 0.891(0.798-0.994)  |       |        | 29.667 | 22 | 0.127 |       |       |       |
|               |                           | Simple mode     |    | -0.201 | 0.134             | 0.148 | 0.818(0.629-1.064)  |       |        |        |    |       |       |       |       |
| Weighted mode | -0.215                    | 0.119           |    | 0.086  | 0.807(0.639-1.02) |       |                     |       |        |        |    |       |       |       |       |
| Streptococcus | Streptococcus umgs 1914   | MR Egger        | 12 | -0.905 | 2.456             | 0.720 | 0.404(0.003-49.794) | 0.133 | 24.065 | 4.295  | 10 | 0.933 | 0.077 | 0.252 | 0.768 |
|               |                           | Weighted median |    | -0.187 | 0.094             | 0.046 | 0.83(0.69-0.997)    |       |        |        |    |       |       |       |       |
|               |                           | IVW             |    | -0.160 | 0.072             | 0.026 | 0.852(0.74-0.981)   |       |        | 4.387  | 11 | 0.957 |       |       |       |
|               |                           | Simple mode     |    | -0.279 | 0.147             | 0.085 | 0.757(0.567-1.01)   |       |        |        |    |       |       |       |       |
|               |                           | Weighted mode   |    | -0.236 | 0.143             | 0.128 | 0.79(0.597-1.046)   |       |        |        |    |       |       |       |       |
|               | Streptococcus umgs 2210   | MR Egger        | 9  | -1.065 | 1.844             | 0.582 | 0.345(0.009-12.799) | 0.098 | 22.771 | 10.444 | 7  | 0.165 | 0.091 | 0.192 | 0.648 |
|               |                           | Weighted median |    | -0.219 | 0.112             | 0.050 | 0.803(0.645-1)      |       |        |        |    |       |       |       |       |
|               |                           | IVW             |    | -0.187 | 0.091             | 0.041 | 0.829(0.694-0.992)  |       |        | 10.783 | 8  | 0.214 |       |       |       |
|               |                           | Simple mode     |    | -0.318 | 0.181             | 0.116 | 0.728(0.511-1.037)  |       |        |        |    |       |       |       |       |

|                                 |    |                 |    |        |       |       |                      |       |        |        |    |        |        |       |       |  |  |
|---------------------------------|----|-----------------|----|--------|-------|-------|----------------------|-------|--------|--------|----|--------|--------|-------|-------|--|--|
|                                 |    | Weighted mode   |    | -0.297 | 0.158 | 0.097 | 0.743(0.545-1.013)   |       |        |        |    |        |        |       |       |  |  |
| Streptococcus umgs 1150         | 17 | MR Egger        |    | 0.726  | 1.830 | 0.697 | 2.067(0.057-74.665)  | 0.200 | 26.202 | 20.917 | 15 | 0.139  | -0.061 | 0.190 | 0.752 |  |  |
|                                 |    | Weighted median |    | 0.138  | 0.081 | 0.091 | 1.148(0.978-1.346)   |       |        |        |    |        |        |       |       |  |  |
|                                 |    | IVW             |    | 0.137  | 0.063 | 0.031 | 1.147(1.012-1.299)   |       |        |        |    | 21.062 | 16     | 0.176 |       |  |  |
|                                 |    | Simple mode     |    | 0.258  | 0.152 | 0.109 | 1.294(0.961-1.743)   |       |        |        |    |        |        |       |       |  |  |
|                                 |    | Weighted mode   |    | 0.226  | 0.140 | 0.126 | 1.253(0.953-1.648)   |       |        |        |    |        |        |       |       |  |  |
| Streptococcus infantis_mgs_1655 | 8  | MR Egger        |    | 0.261  | 2.222 | 0.910 | 1.298(0.017-101.037) | 0.092 | 24.043 | 3.984  | 6  | 0.679  | -0.005 | 0.234 | 0.983 |  |  |
|                                 |    | Weighted median |    | 0.237  | 0.120 | 0.048 | 1.268(1.002-1.604)   |       |        |        |    |        |        |       |       |  |  |
|                                 |    | IVW             |    | 0.211  | 0.093 | 0.023 | 1.235(1.029-1.482)   |       |        |        |    | 3.984  | 7      | 0.782 |       |  |  |
|                                 |    | Simple mode     |    | 0.207  | 0.169 | 0.260 | 1.23(0.884-1.713)    |       |        |        |    |        |        |       |       |  |  |
|                                 |    | Weighted mode   |    | 0.260  | 0.147 | 0.120 | 1.296(0.973-1.728)   |       |        |        |    |        |        |       |       |  |  |
| Streptococcus mitis AK mgs 2168 | 13 | MR Egger        |    | -0.813 | 2.460 | 0.747 | 0.444(0.004-55.129)  | 0.143 | 24.409 | 6.843  | 11 | 0.812  | 0.072  | 0.258 | 0.784 |  |  |
|                                 |    | Weighted median |    | -0.090 | 0.081 | 0.267 | 0.914(0.78-1.071)    |       |        |        |    |        |        |       |       |  |  |
|                                 |    | IVW             |    | -0.123 | 0.062 | 0.048 | 0.884(0.783-0.999)   |       |        |        |    | 6.921  | 12     | 0.863 |       |  |  |
|                                 |    | Simple mode     |    | -0.014 | 0.131 | 0.917 | 0.986(0.763-1.275)   |       |        |        |    |        |        |       |       |  |  |
|                                 |    | Weighted mode   |    | -0.031 | 0.125 | 0.809 | 0.97(0.759-1.238)    |       |        |        |    |        |        |       |       |  |  |
|                                 |    | MR Egger        | 12 | -1.896 | 1.230 | 0.154 | 0.15(0.013-1.672)    | 0.139 | 25.358 | 9.277  | 10 | 0.506  | 0.185  | 0.131 | 0.189 |  |  |

|            |                                       |                 |    |        |       |       |                    |       |        |        |    |       |       |       |       |
|------------|---------------------------------------|-----------------|----|--------|-------|-------|--------------------|-------|--------|--------|----|-------|-------|-------|-------|
|            | Streptococcus umgs 1667               | Weighted median |    | -0.191 | 0.094 | 0.043 | 0.826(0.687-0.994) |       |        |        |    |       |       |       |       |
|            |                                       | IVW             |    | -0.165 | 0.071 | 0.020 | 0.848(0.738-0.974) |       |        | 11.266 | 11 | 0.421 |       |       |       |
|            |                                       | Simple mode     |    | -0.213 | 0.147 | 0.176 | 0.808(0.606-1.078) |       |        |        |    |       |       |       |       |
|            |                                       | Weighted mode   |    | -0.202 | 0.134 | 0.161 | 0.817(0.628-1.063) |       |        |        |    |       |       |       |       |
| Prevotella | Prevotella co nceptionensis _mgs_1136 | MR Egger        | 9  | -0.492 | 3.958 | 0.905 | 0.612(0-1430.608)  | 0.099 | 23.189 | 17.384 | 7  | 0.015 | 0.027 | 0.413 | 0.951 |
|            |                                       | Weighted median |    | -0.252 | 0.115 | 0.029 | 0.777(0.62-0.975)  |       |        |        |    |       |       |       |       |
|            |                                       | IVW             |    | -0.238 | 0.119 | 0.045 | 0.788(0.625-0.995) |       |        | 17.394 | 8  | 0.026 |       |       |       |
|            |                                       | Simple mode     |    | -0.209 | 0.174 | 0.264 | 0.812(0.578-1.141) |       |        |        |    |       |       |       |       |
|            |                                       | Weighted mode   |    | -0.251 | 0.143 | 0.118 | 0.778(0.588-1.03)  |       |        |        |    |       |       |       |       |
|            | Prevotella umgs 1554                  | MR Egger        | 11 | -1.378 | 1.841 | 0.473 | 0.252(0.007-9.306) | 0.138 | 25.204 | 12.347 | 9  | 0.194 | 0.124 | 0.194 | 0.540 |
|            |                                       | Weighted median |    | -0.218 | 0.120 | 0.068 | 0.804(0.636-1.016) |       |        |        |    |       |       |       |       |
|            |                                       | IVW             |    | -0.207 | 0.097 | 0.034 | 0.813(0.672-0.985) |       |        | 12.904 | 10 | 0.229 |       |       |       |
|            |                                       | Simple mode     |    | -0.351 | 0.167 | 0.062 | 0.704(0.508-0.976) |       |        |        |    |       |       |       |       |
|            |                                       | Weighted mode   |    | -0.240 | 0.141 | 0.121 | 0.787(0.596-1.038) |       |        |        |    |       |       |       |       |
|            | Prevotella oulorum gs 3240            | MR Egger        | 11 | -0.269 | 0.726 | 0.719 | 0.764(0.184-3.171) | 0.137 | 27.218 |        |    |       |       |       |       |
|            |                                       | Weighted median |    | -0.203 | 0.096 | 0.034 | 0.816(0.676-0.985) |       |        |        |    |       |       |       |       |
|            |                                       | IVW             |    | -0.189 | 0.074 | 0.011 | 0.828(0.716-0.958) |       |        |        |    |       |       |       |       |

|              |                                         |                 |   |        |       |       |                    |       |        |       |   |       |        |       |       |
|--------------|-----------------------------------------|-----------------|---|--------|-------|-------|--------------------|-------|--------|-------|---|-------|--------|-------|-------|
|              |                                         | Simple mode     |   | -0.229 | 0.129 | 0.106 | 0.795(0.617-1.024) |       |        |       |   |       |        |       |       |
|              |                                         | Weighted mode   |   | -0.214 | 0.117 | 0.097 | 0.807(0.641-1.015) |       |        |       |   |       |        |       |       |
| Haemophilus  | Haemophilus D parainfluenzae A mgs 2988 | MR Egger        | 9 | 1.188  | 2.136 | 0.595 | 3.28(0.05-215.624) | 0.118 | 25.123 | 3.686 | 7 | 0.815 | -0.107 | 0.229 | 0.654 |
|              |                                         | Weighted median |   | 0.194  | 0.108 | 0.073 | 1.214(0.982-1.5)   |       |        |       |   |       |        |       |       |
|              |                                         | IVW             |   | 0.188  | 0.084 | 0.025 | 1.207(1.023-1.424) |       |        | 3.906 | 8 | 0.866 |        |       |       |
|              |                                         | Simple mode     |   | 0.203  | 0.152 | 0.218 | 1.226(0.91-1.651)  |       |        |       |   |       |        |       |       |
|              |                                         | Weighted mode   |   | 0.189  | 0.151 | 0.248 | 1.208(0.898-1.625) |       |        |       |   |       |        |       |       |
| Oribacterium | Oribacterium umgs 1938                  | MR Egger        | 9 | -0.407 | 1.303 | 0.764 | 0.665(0.052-8.553) | 0.108 | 25.465 | 7.371 | 7 | 0.391 | 0.026  | 0.139 | 0.858 |
|              |                                         | Weighted median |   | -0.091 | 0.109 | 0.407 | 0.913(0.737-1.132) |       |        |       |   |       |        |       |       |
|              |                                         | IVW             |   | -0.167 | 0.081 | 0.040 | 0.846(0.722-0.992) |       |        | 7.407 | 8 | 0.493 |        |       |       |
|              |                                         | Simple mode     |   | -0.073 | 0.138 | 0.610 | 0.93(0.71-1.218)   |       |        |       |   |       |        |       |       |
|              |                                         | Weighted mode   |   | -0.063 | 0.134 | 0.653 | 0.939(0.722-1.222) |       |        |       |   |       |        |       |       |
|              | Oribacterium umgs 1591                  | MR Egger        | 7 | -3.213 | 5.155 | 0.560 | 0.04(0-983.196)    | 0.088 | 22.793 | 0.974 | 5 | 0.965 | 0.295  | 0.515 | 0.592 |
|              |                                         | Weighted median |   | -0.230 | 0.117 | 0.050 | 0.795(0.632-1)     |       |        |       |   |       |        |       |       |
|              |                                         | IVW             |   | -0.266 | 0.097 | 0.006 | 0.767(0.634-0.927) |       |        | 1.301 | 6 | 0.972 |        |       |       |
|              |                                         | Simple mode     |   | -0.191 | 0.156 | 0.267 | 0.826(0.609-1.121) |       |        |       |   |       |        |       |       |
|              |                                         | Weighted mode   |   | -0.215 | 0.149 | 0.199 | 0.806(0.602-1.08)  |       |        |       |   |       |        |       |       |

Supplementary Material

|               |                         |                 |   |       |       |       |                      |       |        |       |   |       |        |       |       |
|---------------|-------------------------|-----------------|---|-------|-------|-------|----------------------|-------|--------|-------|---|-------|--------|-------|-------|
| Solobacterium | Solobacterium umgs 2560 | MR Egger        | 6 | 1.819 | 2.233 | 0.461 | 6.165(0.078-490.316) | 0.072 | 24.628 | 0.456 | 4 | 0.978 | -0.165 | 0.244 | 0.535 |
|               |                         | Weighted median |   | 0.363 | 0.146 | 0.013 | 1.438(1.08-1.913)    |       |        |       |   |       |        |       |       |
|               |                         | IVW             |   | 0.307 | 0.111 | 0.006 | 1.36(1.094-1.689)    |       |        | 0.916 | 5 | 0.969 |        |       |       |
|               |                         | Simple mode     |   | 0.382 | 0.196 | 0.109 | 1.465(0.998-2.151)   |       |        |       |   |       |        |       |       |
|               |                         | Weighted mode   |   | 0.386 | 0.184 | 0.090 | 1.471 (1.026-2.11)   |       |        |       |   |       |        |       |       |

SNP, Single Nucleotide Polymorphism; SE, Standard Error; OR, Odds Ratio; CI, Confidence Interval; MR, Mendelian Randomization; IVW, Inverse Variance Weighted; Q\_df, degrees of freedom of Cochran's Q
